# Supplementary material for: Bacillus amyloliquefaciens 11B91 inoculation enhances the growth of quinoa (Chenopodium quinoa Willd.) under salt stress
Source: PeerJ. 2023 Aug 24;11:e15925. doi: 10.7717/peerj.15925 (PMC10460562; doi:10.7717/peerj.15925)
Supplement: Supplemental Information 1 [file peerj-11-15925-s001.xlsx]

## Sheet: Chlorophyll a in the first week
Chlorophyll a in the first week of salt treatment
LB		11B91
Average value	SD	Average value	SD
1.39931	0.0479	1.55643	0.09745
0.85291	0.05458	1.63213	0.068
0.75049	0.05608	1.46401	0.03191

## Sheet: Chlorophyll a in the second wee
Chlorophyll a in the second week of salt treatment
LB		11B91
Average value	SD	Average value	SD
1.46329	0.09178	1.80688	0.09499
1.14453	0.06284	1.10758	0.03317
0.59085	0.14485	1.55048	0.08994

## Sheet: Chlorophyll a in the third week
Chlorophyll a in the third week of salt treatment
LB		11B91
Average value	SD	Average value	SD
0.57824	0.02312	0.91241	0.07509
0.74668	0.04109	0.68108	0.03094
0.62881	0.05541	0.8474	0.07365

## Sheet: Chlorophyll b during the first 
Chlorophyll b during the first week of salt treatment
LB		11B91
Average value	SD	Average value	SD
0.36489	0.04951	0.35545	0.04345
0.66125	0.16977	0.49797	0.06311
0.16232	0.04291	0.33894	0.03295

## Sheet: Chlorophyll b in the second wee
Chlorophyll b in the second week of salt treatment
LB		11B91
Average value	SD	Average value	SD
0.28073	0.03459	0.40823	0.06099
0.19235	0.03086	0.19568	0.01148
0.20485	0.03036	0.36128	0.03692

## Sheet: Chlorophyll b in the third week
Chlorophyll b in the third week of salt treatment
LB		11B91
Average value	SD	Average value	SD
0.19778	0.02033	0.24687	0.03069
0.20319	0.00954	0.16879	0.02385
0.24646	0.04306	0.29705	0.05774

## Sheet: Dry weight of promoting stem
Dry weight of promoting stem
LB		11B91
Average value	SD	Average value	SD
0.08018	0.00768	0.1022	0.00964
0.0814	0.01516	0.0951	0.00796
0.2128	0.01578	0.1935	0.03607

## Sheet: Dry weight of the first week of
Dry weight of the first week of salt treatment
LB		11B91
Average value	SD	Average value	SD
0.09542	0.01841	0.11552	0.009
0.10857	0.02264	0.13087	0.01504
0.04048	0.00656	0.09425	0.00757

## Sheet: Dry weight of the second week o
Dry weight of the second week of salt treatment
LB		11B91
Average value	SD	Average value	SD
0.08018	0.00768	0.1022	0.00964
0.0814	0.01516	0.0951	0.00796
0.2128	0.01578	0.1935	0.03607

## Sheet: Dry weight of the third week of
Dry weight of the third week of salt treatment
LB		11B91
Average value	SD	Average value	SD
0.26633	0.02773	0.29632	0.03731
0.26135	0.03063	0.28972	0.02386
0.15175	0.01829	0.22008	0.02687

[truncated: 16 more sheets: Fresh weight in the first week , Fresh weight in the third week , Fresh weight of promoting stem, Fresh weight of the second week, Growth promoting chlorophyll a, Growth promoting chlorophyll b, Promoting root activity, Promoting the fresh weight of r, Promoting total phosphorus cont, Root activity in the first week, Root activity in the second wee, Root activity in the third week, Root promoting dry weight, Total phosphorus content in the, TotalSEC, Total phosphorus THIR]
